# Supplementary material for: Associations between sounds and actions in early auditory cortex of nonhuman primates
Source: eLife. 2019 Apr 4;8:e43281. doi: 10.7554/eLife.43281 (PMC6467566; doi:10.7554/eLife.43281)
Supplement: Figure 3—source data 1. — The table shows the p value of each comparison. [file elife-43281-fig3-data1.xlsx]

## Sheet: Sheet1
Figure 3 - source data 1
	S1-no-go	S2-no-go
S1-uncertain	4.95e-12	1.13e-08
S2-go	9.14e-13	1.42e-14
S2-nil (3-3)	5.75e-11	1.76e-08
S2-nil (1-3)	3.41e-07	6.61e-07
