# Supplementary material for: Associations between sounds and actions in early auditory cortex of nonhuman primates
Source: eLife. 2019 Apr 4;8:e43281. doi: 10.7554/eLife.43281 (PMC6467566; doi:10.7554/eLife.43281)
Supplement: Figure 3—source data 2. — Conventions are equivalent to those of Figure 3—source data 1. [file elife-43281-fig3-data2.xlsx]

## Sheet: Sheet1
Figure 3 - source data 2
	S1-no-go	S2-no-go
S1-uncertain	5.11e-43	1.40e-44
S2-go	2.04e-20	9.77e-42
S2-nil (3-3)	1.36e-42	7.02e-45
S2-nil (1-3)	1.68e-28	2.79e-42
